# Supplementary material for: Ambient-temperature fabrication of melamine-based sponges coated with hydrophobic lignin shells by surface dip adsorbing for oil/water separation
Source: Royal Society of Chemistry journal article supplement (doi:10.1039/c6ra18329h), 2016-01-01
Supplement: c6ra18329h1.pdf [file c6ra18329h1.pdf]

Electronic Supplementary Material (ESI) for RSC Advances.  
This journal is © The Royal Society of Chemistry 2016

## Ambient-temperature fabrication of melamine-based sponges coating with hydrophobic lignin shells by surface dip adsorbing for oil/water separation

Zhiwen Lei,<sup>a</sup> Yonghong Deng<sup>\*b</sup> and Chaoyang Wang<sup>\*a</sup>

<sup>a</sup>Research Institute of Materials Science, South China University of Technology, Guangzhou 510640, China

<sup>b</sup>Department of Materials Science & Engineering, South University of Science and Technology of China, Shenzhen 518055, China

\*Corresponding author. E-mail: zhywang@scut.edu.cn (C.Y. Wang); yhdeng08@163.com (Y.H. Deng)

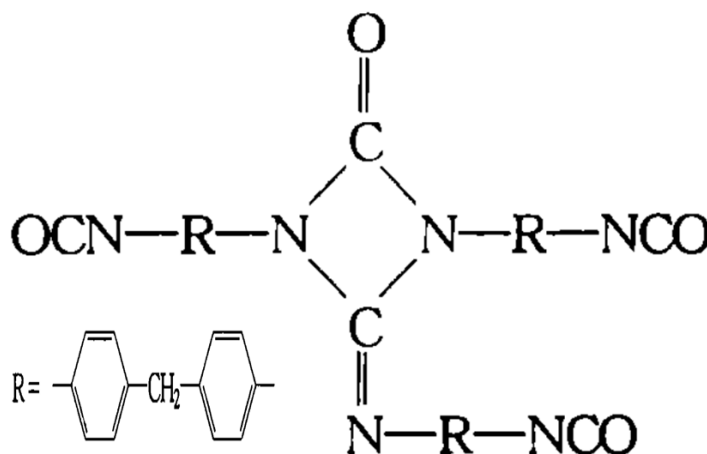

**Fig. S1.** The structure of carbodiimide modified diphenyl methane di-isocyanate (MMDI).

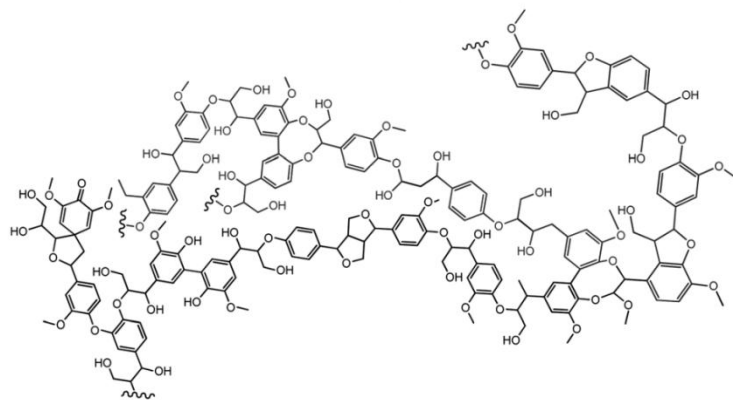

**Fig. S2.** The typical structure of Lignin.

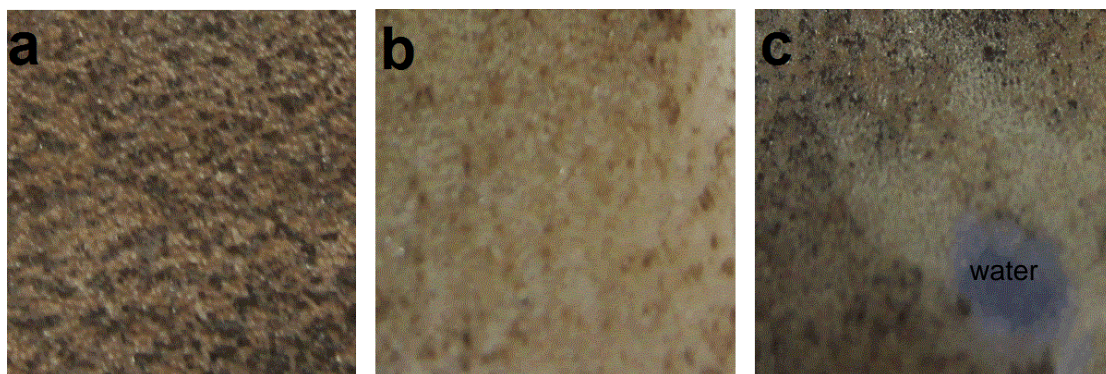

**Fig. S3.** Photos of LMF sponges prepared by: (a) 0.01 g/mL of Lignin and 0.01 g/mL of MMDI, (b) 0.005 g/mL of Lignin and 0.005 g/mL of MMDI, (c) 0.01 g/mL of Lignin and 0.005 g/mL of MMDI.

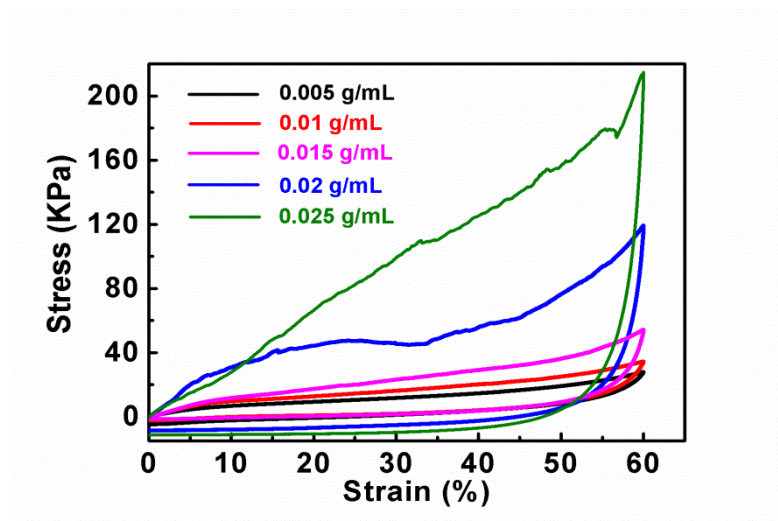

**Fig. S4.** Compressive stress-strain curves of LMF sponges at different concentrations of lignin.

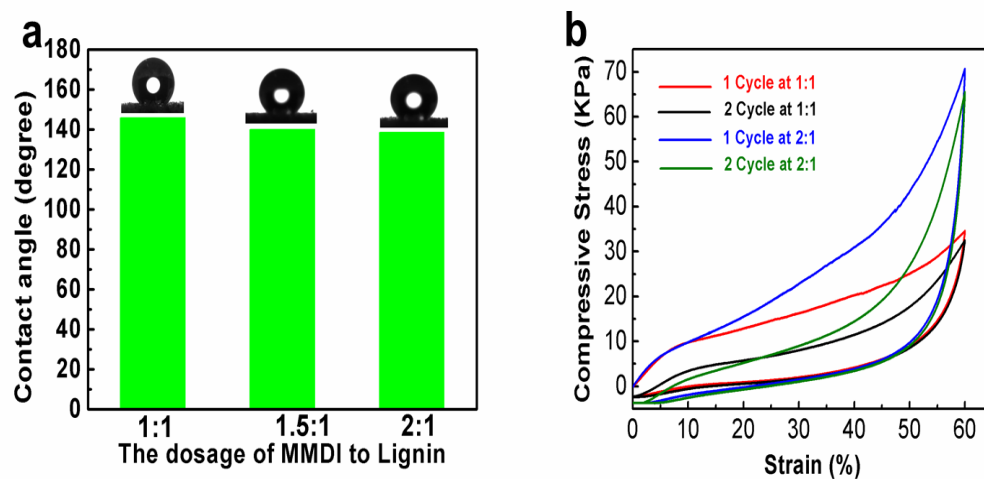

**Fig. S5.** The water contact angles (a) and Compressive stress-strain curves (b) of LMF sponges at different usages of MMDI to lignin.

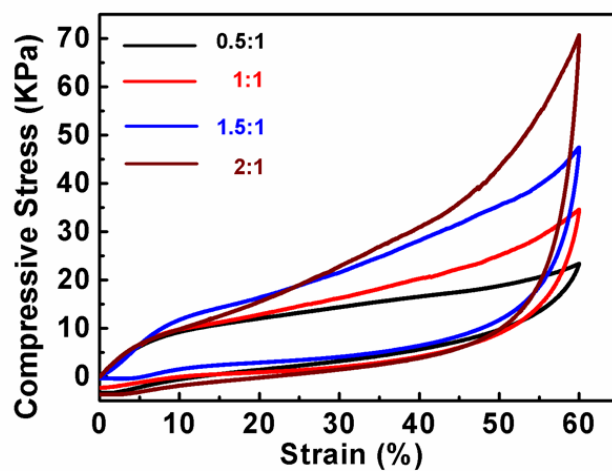

**Fig. S6.** Compressive stress-strain curves of LMF sponges at different usages of MMDI to lignin.

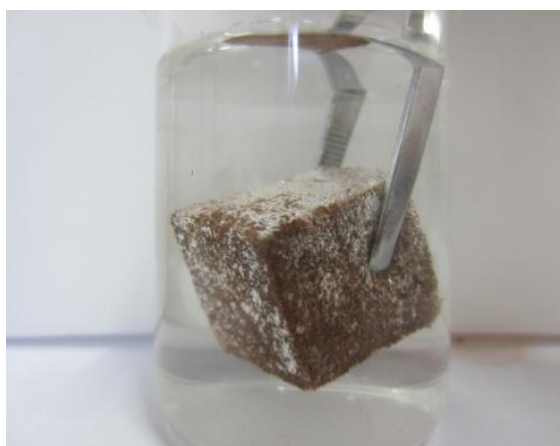

**Fig. S7.** Mirror-like phenomenon can be observed on the LMF sponge in the water after 1000 cycles of compression testing at the strain value of 60%.
